# Supplementary material
Source: publisher site journal article supplement (https://www.dovepress.com/article/375582)
Supplement: Supplementary file 1 [file get_supplementary_file.php]

1 Borja Brugés et al

2 **Willingness to Pay and Preferences among Patients Undergoing Cystoscopies: Results from a Large**  
3 **Survey-based Study in Spain**

4 ***Appendix 1***

5 **Questionnaire Translated**

6 Consent

7 Dear Participant, this survey is being distributed with the aim of supporting a research project led by Cindy Borja  
8 as part of her Thesis for the Master's degree in Business Administration and Healthcare Innovation, at the  
9 Copenhagen Business School, CBS. Cindy Borja, in cooperation with the medical device company Ambu, will  
10 focus her research on patients' preference for cystoscopy procedures. We would like to invite you to participate  
11 in this study to determine patient preferences for single-use or reusable cystoscopes. The questionnaire is  
12 estimated to take approximately 8 minutes to complete. You only need to complete the survey once.

13 Only fully completed questionnaires will be included in the analysis. No patient identification data will be  
14 collected in this survey. Therefore, by clicking the "continue" button, button located at the bottom, you are giving  
15 your consent for the researchers to use your answers provided for the purposes described above anonymously.

16 The information collected will be used in a master's thesis that will be published and will support other research  
17 in the future, being shared anonymously with other researchers. Please answer the questions below from your  
18 perspective as a patient.

19 I am over 18 years of age and I understand that my participation in this survey is voluntary. I am free to leave the  
20 survey at any time I wish, without having to give any reason and without any consequences. If you have  
21 questions about the survey, please contact Cindy Borja at cibo13ab@student.cbs.dk. Thanks in advance for  
22 your participation and collaboration!

23 **Part I**

24 **1. Please indicate your place of residence**

25 1. Andalusia

26 2. Aragón

27 3. Asturias

28 4. Canary Islands

- 29 5. Cantabria
- 30 6. Castilla de la Mancha
- 31 7. Castile and Leon
- 32 8. Catalonia
- 33 9. Madrid
- 34 10. Valencian Community
- 35 11. Extremadura
- 36 12. Galicia
- 37 13. Balearic Islands
- 38 14. The Rioja
- 39 15. Basque Country
- 40 16. Murcia
- 41 17. Navarre

42 **2, How old are you?**

- 43 1. 18 - 29
- 44 2. 30 - 39
- 45 3. 40 - 49
- 46 4. 50 - 59
- 47 5. 60 - 69
- 48 6. 70 - 79
- 49 7. 80 - 89
- 50 8. 90 or greater

51 **3. How were you born anatomically?**

- 52 1. Female
- 53 2. Male
- 54 3. I don't want to answer this question

55 **Part II: A Cystoscopy is a procedure that allows a visual inspection of the inside of the bladder and**  
56 **urethra. A cystoscopy can be used for therapeutic or diagnostic purposes. There are a number of**  
57 **reasons why a healthcare specialist may recommend a cystoscopy. For example: Hematuria, Recurrent**  
58 **urinary tract infections, abnormal urinary symptoms. The cystoscopy procedure can be carried out in**  
59 **different settings including an operating room or in a specialist's office.**

60 **1. How many cystoscopy procedures have you had previously?**

61 1. 0

62 2. 1 - 3

63 3. 4 - 6

64 4. 7 - 9

65 5. 10 or more

66 **2. Did you have your cystoscopy in a private or public hospital / clinic?**

67 1. Private

68 2. Public

69 3. Both private and public

70 4. I do not remember

71 **Cystoscopy is performed with a reusable cystoscope. For cleaning, the device requires reprocessing**  
72 **between each procedure to ensure disinfection and guarantee the safety of the next patient. Sanitary**  
73 **reprocessing of reusable cystoscopes includes the use of chemicals and trained personnel to carry it**  
74 **out. (Image reusable cystoscope)**

75 **A medical device company has developed a single-use sterile cystoscope. This single-use cystoscope**  
76 **comes sealed in sterile packaging ready for use on each patient, once the procedure is completed, the**  
77 **cystoscope is discarded. The performance of the single-use cystoscope is comparable to the**  
78 **performance of the reusable cystoscope in terms of image quality and bending capacity. (Image single**  
79 **use cystoscope)**

80 **3. If you had a choice, would you prefer to have a cystoscopy with a single-use or reusable device?**

81 1. Single use cystoscope

82 2. Reusable Cystoscope

83 3. I do not have preferences

- 84 **3.1 Please comment Why would you prefer to have the procedure done with a reusable cystoscope? :**
- 85 **4. In a hypothetical scenario, would you be willing to pay a small extra fee to perform your cystoscopy**
- 86 **with a single-use device rather than a reusable one?**
- 87 1. Yes
- 88 2. No
- 89 3. I do not know
- 90 **5. Can you imagine asking your doctor if he / she could perform a cystoscopy with a single-use device**
- 91 **instead of a reusable one?**
- 92 1. Yes
- 93 2. No
- 94 3. I do not know
- 95 **6. If the hospital / clinic you serve ONLY offers a cystoscopy with reusable and NOT single-use**
- 96 **cystoscopes, Would you rather find another hospital / clinic where you can have your cystoscopy done**
- 97 **with a single use cystoscope?**
- 98 1. Yes
- 99 2. No
- 100 3. I do not know
- 101 **7. Would you prefer to have the Consultation and the Cystoscopy on the same day or on two different**
- 102 **days?**
- 103 1. Consultation and cystoscopy on the same day
- 104 2. Consultation and Cystoscopy on two different days
- 105 3. I do not know
- 106 **8.Are you concerned about the possibility of the cystoscope becoming contaminated (presence of**
- 107 **infectious agents in the cystoscope), when you have a cystoscopy procedure?**
- 108 1. Yes
- 109 2. No
- 110 3. I do not know

111 **9. You have any of the following concerns regarding single-use or reusable cystoscopes: (Leave blank if**  
112 **the specific concern is not important to you, if you are not concerned with any concerns, please click**  
113 **"none"**

|                                | Single Use Cystoscopes   | Reusable Cystoscopes     |
|--------------------------------|--------------------------|--------------------------|
| Contamination                  | <input type="checkbox"/> | <input type="checkbox"/> |
| Environmental impact           | <input type="checkbox"/> | <input type="checkbox"/> |
| Urinary tract infection        | <input type="checkbox"/> | <input type="checkbox"/> |
| Cystoscope rate of performance | <input type="checkbox"/> | <input type="checkbox"/> |
| None                           | <input type="checkbox"/> | <input type="checkbox"/> |

114

115 **10. In times of COVID-19, are you more concerned than before about exposure to contamination**  
116 **(presence of infectious agents in the cystoscope), regarding your cystoscopy procedure?**

117 1. Yes

118 2. No

119 3. I do not know

120 **11. During the cystoscopy process, the doctor connects the cystoscope to a screen. This allows the**  
121 **doctor and the patient to follow the procedure inside the bladder and urethra. Would it be valuable to**  
122 **you to get a photo or video of the findings of the cystoscopy procedure?**

123 1. Yes

124 2. No

125 3. I do not know

126 **Part III The preferred setting for treatment Thanks for your help so far! This is the last section of the**  
127 **questionnaire and you will now be introduced to what-if scenarios for your choice. In the next six**  
128 **questions you will be presented with two different scenarios in each question. Please select only one**  
129 **scenario which best suits your needs.**

130

| <b>Attributes</b>             | <b>Alternative 1</b> | <b>Alternative 2</b> |
|-------------------------------|----------------------|----------------------|
| Direct Cystoscopy             | No                   | Yes                  |
| Risk of Cancellation          | 6%                   | 6%                   |
| Contamination                 | 0%                   | 0%                   |
| Negative Environmental Impact | High                 | High                 |
| Cost per Procedure            | 165€                 | 70€                  |

131

132

133

134

135

136

137

138

139

140

141

142

143

144

145

146

147 Borja Brugés et al

148 **Willingness to Pay and Preferences among Patients Undergoing Cystoscopies: Results from a Large**  
149 **Survey-based Study in Spain**

150 ***Appendix 2***

151 ***Discrete choice experiment***

152 Lancaster's approach comes with the principle that all the goods have attributes which are demanded by the  
153 consumers. This opinion led to analyze the demand of a good in a different way as the traditional demand theory  
154 would not be able to forecast the fluctuation on demand when a specific attribute or characteristic was changed.  
155 Subsequently, Batten and Johansson (1987) prolonged the Lancaster's model to preferences groups, studying  
156 substitute products as well as technological changes. Later Trajtenberg (1990) outlined theoretically and  
157 econometrically the basis to measure social gains from innovation in goods changing characteristics like prices,  
158 production costs, attributes and preferences.<sup>1</sup> Choice experiments are better to measure passive values, as the  
159 utility connected with an alternative, is a function of the observed level and also the unobserved ones. In a  
160 Discreet Choice Experiment (DCE) method the attribute levels can be controlled in the experiment and through  
161 this technique a quantifiable result of the impact of the changes in attribute levels on the choices can be found  
162 by decompiling the choice. In other words, this quantitative technique helps to elicit individual preferences and  
163 uncover what is the value that a respondent will put into a specific attribute of a product or intervention when  
164 being exposed to hypothetical alternatives. Some of the reasons are that they can prove a more well-off  
165 description of the attribute tradeoffs that individuals are willing to make, that is to say, it helps to comprehend the  
166 relative valuations of various attributes, Additionally DCE have become popular in healthcare for example for  
167 healthcare provision and treatment characteristics, and it also allows to include non-health characteristics related  
168 to process utility like the contingent valuation method. The use of DCE may help to design future services or  
169 existing ones and consequently identify any opportunity cost, meaning potential benefits that one could miss  
170 when choosing one alternative over another.<sup>2</sup>

171 To carry a DCE, efforts are required to develop the scenarios with appropriate attributes which also has to have  
172 an attribute-based approach to measure the amount of other goods required for compensation. Thereafter the  
173 use of a proper statistical method is required.

174 The International Society for Pharmacoeconomics and Outcomes Research (ISPOR) created good research  
175 practices for conjoint analysis in health care applications, thanks to regular meetings with the aim to identify  
176 relevant steps and improve key criteria in conjoint analyses plus following the structure established from  
177 Drummond.<sup>2</sup> It resulted in a 10 items checklist: 1) research question; 2) attributes and levels; 3) construction of  
178 tasks; 4) experimental design; 5) preference elicitation; 6) instrument design; 7) data- collection plan; 8)  
179 statistical analyses; 9) results and conclusions; and 10) study presentation. This check list can facilitate to  
180 compare good research practice for applications of conjoint methods in healthcare studies.<sup>3</sup>

181 Another more specific approach from the article “Constructing Experimental Designs for Discrete-Choice  
182 Experiments: Report of the ISPOR Conjoint Analysis Experimental Design Good Research Practices Task  
183 Force” aims to be more explicit in regards the experimental design for Discreet Choice Experiments<sup>4</sup>. Instead of  
184 a checklist, it is illustrating the key stages for the experimental design of a DCE. The key stages are: 1) research  
185 question; 2) attributes and levels; 3) Choice Question Format; 4) Analysis Requirements 5) Experimental Design;  
186 6) Data; 7) Statistical Analysis. For this study both of the previous artefacts will be used in a combined way to  
187 describe as appropriable as possible the DCE method used.

#### 188 **1) Research Question:**

189 Is relevant for a good research question to specify a testable hypothesis (exploratory and/or descriptive) and to  
190 define the study perspective and reasons behind the study.<sup>3</sup>

191 **Hypothesis:** the main objective of this study is to be able to identify patients' preferences within cystoscopy  
192 procedures focused on the type of devices being used. The raised hypothesis aims to identify which are the  
193 most relevant attributes/characteristics for decision making. This is done by defining the correspondent features  
194 and finding which are statistically significant meaning the noteworthiness role in patients' choice. Additionally,  
195 significant relevance is concentrated on measuring their overall willingness to pay and per specific attribute  
196 when comparing the preference of patients within both devices, single-use and reusable ones.

197 **Perspective:** The study is being addressed from the patient's perspective. The results from this study aims to  
198 contribute in the enhancement of the patient's voice across public and private hospitals/clinics across Spain as  
199 well as in a general way for patients who may undergone a cystoscopy. Then the results may well contribute



200 partly for an overall HTA evaluation for decision making if these results could be complemented with the other  
201 relevant aspects for a health technology assessment. The definition of patients in this paper is defined as  
202 individuals over 18 years old who had undergone at least one cystoscopy procedure in the past. The reasons  
203 why a patient may have resulted undergoing cystoscopy procedures are not relevant to the inclusion criteria  
204 neither social economical level meaning aspects like income, level or education, employment etc., are not being  
205 classified. It also assumed that all the patients from the Spanish sample count with the same public coverage for  
206 healthcare interventions and social supports.

207 **Rational for DCE:** Among the variety of techniques, DCEs have become in recent years, the most commonly  
208 applied method in healthcare.<sup>4</sup> This study aims to contribute to the patient's aspect of a health technology  
209 assessment. To do so the DCE method to elicit preferences helps to assign utilities to the stated predilections  
210 denoted by the individuals. In contrast to extra-welfarist methods, where the weighting of the outcomes can be  
211 based on principles across individuals rather than based on preferences. In the same manner alternatively to  
212 ways defining outcomes like health status, life years, QALYs, DALYs, illness events avoid, among others, the  
213 method of discreet choice experiment has been chosen as it aims to clarify the individual perspective without any  
214 health outcome measure. Consequently, ranking and rating methods can help to assign values to some extent in  
215 an ordinal scale but still is difficult to assign absolute values to preferences.

216 The method allows to easily reveal the individual trade-off between the features of the intervention or service  
217 estimating the relative importance of the attribute to be able to predict a possible demand, in other words it can  
218 also help to measure the trade-offs which are often implicit in the questions of choice.<sup>5</sup>

## 219 **2) Attributes and levels:**

220 To be able to elicit preferences, is necessary to define the most probable profiles/alternatives to patients over  
221 the range of attributes or characteristics of a healthcare intervention. Inclusions and omission of the attributes  
222 may be explained.<sup>3</sup> This paper intent to stick to the health economic terminology by Carlsson and Martisson  
223 (2003) <sup>6</sup>:

224 **Attribute Identification & Selection:** According to Bridges et al 2011, there should be a balance in the  
225 selection of the attributes according to the perspective chosen, what is relevant for the respondents, in this case

226 the patients, and at the same time considering the decision making or policy setting. The identification, inclusion  
227 and/or exclusion of the attributes should be evidence-based.

228 Some of the sources to base the evidence could be by literature review, consultation with clinical experts, pilot  
229 testing, qualitative research or previous studies. The attributes chosen for the DCE were based on the electronic  
230 search of the databases PubMed and Embase, studies were considered after 2010. Several brief summaries  
231 were assed based on reusable cystoscopes in the aim to provide an overall understanding on issues like  
232 infection rates, contamination risks and outbreaks reports, cost on JJ stent removals, and also costs on office,  
233 environment and other adverse events like cancellation risks. Beside some references all the content was based  
234 on the data on file confidential document from Ambu®. The environmental attributes were also based on  
235 literature review plus the assessment of an internal Environmental and Climate Specialist from Ambu®. Extra  
236 inputs were picked from qualitative research like semi-structured interviews with the targeted population and  
237 clinical experts.

238 The number of attributes suggested by a literature review from Ryan and Gerard 2003, suggest an acceptable  
239 amount of four to six attributes for the choice task. Though according to Bridges et al. 2011 there is not a set  
240 rule, however a plausible profile or alternative to be chosen has to be assured. Likewise, a review by Marshall et  
241 al 2010, shows that a 70% of the studies use three to seven attributes and four levels. Is important to remember  
242 that there can be a challenge when incorporating DCE and WTP into economic evaluation as conferring with  
243 Brennan and Dixon 2013, there is not a standardization in the ranges of the attributes.<sup>2</sup> The mixture of attributes  
244 embraces scenarios that are selected from the all the possible scenarios. It is also important to be able to  
245 measure the effects of the attributes in an independent way.

246 **Levels Selection:** The levels of the attributes were collected and defined in the same way than the deduction of  
247 the attributes was done. Other cost prices were compared from the Spanish site “eSalud”  
248 (<http://esalud.oblikue.com/index.asp>) which is based on the Spanish Official Gazette, giving levels of a min of  
249 64.78€, an average of 150.22€ and a max of 293.92€, however it was decided to choose values from a previous  
250 UK survey, to keep standardization as the ranges were very similar.

251 The levels can be categorical, continuous or a probability. Yet no best practices exist in terms of recoding  
252 subjective levels. Furthermore ranges (i.e., 50-100€) were avoided as this would give the chance to respondents  
253 to interpret the levels at their own way which can result in ambiguity among all respondents.

254 ISPOR in their checklist, recommends to limit the levels from 3 to 4, so the full span do not necessarily have to  
255 be included. The decision behind the choice of levels should be transparent and verified by the pilot testing.

### 256 **3) Construction of Tasks / Choice Question Format:**

257 The tasks are the mechanism by which the possible profiles are presented to the respondents, which could be  
258 presented in several ways fluctuating on the number of attributes, profile choices and other alternatives.

259 **Full or Partial Profile:** A full profile was presented to the respondents, meaning each profile/ alternative had all  
260 the attributes included. After a pilot testing it was confirmed that including all the attributes did not cause  
261 misunderstanding in the conception neither was shown any tendency to ignore attributes from the respondent's  
262 side or cognitive fatigue.

263 **Number of Profiles / Alternatives:** Although it can be considered that more profiles/alternatives may represent  
264 more efficiency, according to Bridges et al., 2011, little research shows the effect on respondents when  
265 increasing the profiles. There might be a tendency to lose interest and end in increased distraction if too many  
266 options are shown. In contrast to rating the profiles / alternatives, for this study two alternatives were presented  
267 and it was induced to choose among the two options using the format of the forced choice-elicitation. The two  
268 set of profiles were shown in six scenarios, or six choices situations. However, according to Potoglou et al. 2011  
269 for respondents who do not have experience making choices between two or more profiles/alternatives a best-  
270 worst scale will be more suitable, likewise more attributes could be presented. Subsequently, studies shown that  
271 the preference weight are not statistically significant between the best-worst scale and the standard DCE.<sup>2</sup>

272 **Opt-out or status-quo options:** No Status-quo option was included in each task as this would limit the  
273 estimations of the patient's preferences by censoring the data. This could also affect the statistical efficiency  
274 measurements.<sup>4</sup> Other assumption done is that the inclusion criteria comprised patients who had undergone a  
275 cystoscopy, it could also be seen, as a patient who will be in a scenario where the cystoscopy procedure was  
276 necessary and unavoidable, so even if it was not a hypothetical scenario, a decision regarding the needed

277 cystoscopy procedure would have to be taken imperatively. Status quo option would have given the chance to  
278 the respondent to not choose among any of the profiles/ alternatives presented and this will also represent a  
279 challenge into figuring out the patients' preferences.

280 Two hypothetical alternatives were presented and the patients could answer on their preference. After the first  
281 answer of each respondent, the following scenario was personalized based on the previous answer. The  
282 significance of the results was assessed in a 95% confidence interval being statistically significant all the p-  
283 values lower than 0.05

#### 284 **4) Experimental Design**

285 The experimental design helps analysts to chart the attributes and levels as set of alternatives to be chosen. The  
286 perspective and the identification of the respondents is highly important to define the alternatives. The following  
287 consideration were done and helped to systematically elicit the choice response.

288 • The relevant attributes of the cystoscopy procedure were identified and the stakeholder was identified. In this  
289 case the main stakeholder was a patient who had undergone a cystoscopy procedure.

290 • The specific value of levels and ranges were approved.

291 • The observations were presented in a D-optimal design, explained below.

292 • Strategy of how the data was modelled as a function of levels and attributes. In this case each attribute  
293 represented a variable.

294 A total of five attributes represented by A, and the levels represented by L, led to the calculation of the total  
295 combinations (# alternatives = #levels#attributes). Three levels for four attributes and two levels for one attribute  
296 will equal to the total combinations of 162. (81 x 2) also called a full factorial design. Nevertheless, this full  
297 factorial design would have meant too many combinations for each respondent therefore a D-optimal design was  
298 used to identify the most favorable combination set where the main effects and all the higher order interactions  
299 could still be estimated and assed, this is called a fractional factorial design, keeping the same properties as the  
300 full design in the best possible way capturing all the relevant effects to be assed.

301 **Experimental Design Concepts**

302 **Identification:** The parameters were identified as not being bias and coded accordingly. With this the effects  
303 were also acknowledged to be independent.

304 **Efficiency:** The statistical efficiency of the model may depend on the sample size and on the way the attributes  
305 were combined. For this study a sample of 300 respondents was selected. The combination of attributes was  
306 performed randomly by the survey tool QuestionPro, using the D-optimal design provided by a computer  
307 algorithm, according on the first answer of the respondent the following scenarios will be based on that first  
308 response. This means some scenarios could have been improbable but not illogical.

309 **Implausible Scenarios:** The study may have had implausible scenarios, nevertheless, all the levels chosen  
310 were realistic and this would be complemented with the D optimal design used to mitigated.

311 **Interaction Effects:** In the profiles showed neither type of symptom's severity nor duration was assed. This  
312 could have been an important aspect to estimate to assure the efficiency of the model and be able to help  
313 respondents to evaluate. According to Zwerina at al 1996 the majority of the studies use the fractional factorial  
314 design where the interactions between attributes are insignificant in a two-way or higher order of interactions.  
315 The interaction may take into account how the preference of a patient on one attribute or variable may depend  
316 on the level of another attribute. In contrast to this Louviere et al. 2000 express that the exclusion of the  
317 interactions may not necessarily lead to bias. <sup>7</sup>

318 **Cognitive limitations of particular groups of respondents:** the cognitive capacity of the respondents was not  
319 taken into account. People with Alzheimer, schizophrenia and other neurological conditions were not strictly  
320 excluded.

321 **Labeled and constant alternatives:** No specific labels or names were used during the DCE, though previous  
322 explanation of the single used device launched by Ambu® was described, without mentioning any brand.

323 **Blocking:** Due to the extended full factorial design a blockage of six scenarios were arranged. This this not  
324 mean blockage in questions but instead in the combinations. Thus, resulting in the increase of efficiency of the  
325 respondents.

326 **Orthogonality:** refers to the exposure of all elements or levels of the attributes in a balanced way. According to  
327 Huber and Zwerina there are three properties for efficient designs: 1) the Level Balance: levels of an attribute  
328 occur with equal frequency. 2) Orthogonality: the occurrence of any two levels of the different attributes are  
329 uncorrelated. And 3) The minimal Overlap: the cases where attribute levels do not change across a choice set  
330 should be minimized.<sup>8</sup> Nevertheless there are different ways to make an efficient design and one is the D-  
331 optimal Experimental design.<sup>4</sup> D-optimal design allow parameters to be estimated without bias and minimizing  
332 the variance. Reducing the number of runs to reach an equivalent precision.<sup>9</sup> This was also translated into a  
333 more economical option. However, D-optimal design matrices tend not to be orthogonal and effects appraised  
334 can be correlated. <sup>10</sup> The D optimal design is a computer-generated design which needs an algorithm, this helps  
335 to determine the best experiment making alternative versions for each level and that's how an alternative is  
336 presented to the respondent according to their first answer. This method consists of the best subset of the  
337 theoretically, practical and conceivable possible experiments which could be carried out maximizing the result of  
338 the matrix. It is also good to reduce the number of runs or choice sets required.

### 339 **5) Preference elicitation**

340 As there is not really a defined level of information to be include in the questionnaire, the amount and of  
341 information was assessed by a previous questionnaire in the UK showing satisfaction on patients to the  
342 extension and content of the survey. The discreet choice experiment was introduced with an explanatory text  
343 aiming to help the respondents to previously understand the set-up of the block of questions to answer but not  
344 practice example was performed. The force-choice format was induced.

### 345 **6) Instrument design;**

346 The survey questionnaire was divided into four sections: 1) Introduction and Informed Consent: a brief  
347 introduction on the aim of the study, the anonymity of personal information and an informed consent was  
348 described in this section, allowing the participant to reflect and agree voluntarily to the survey. All the participants  
349 had the choice to leave the survey without giving any reason, whenever they would like to 2) Part 1: Descriptive  
350 Information: general questions to find info on Age, Residence, Gender etc. 3) Part 2: Cystoscopy Procedures  
351 and Devices: an introduction to the cystoscopy procedure was provided here as well as a brief difference on the

352 type of cystoscopes of single use vs reusable, general questions were also stated in this section, like the context  
353 of the cystoscopy i.e. public/private hospital/clinic, overall willingness to pay, general concerns on the procedure,  
354 the cystoscope and overall concern on Covid-19 and lastly more specific characteristics of concern on the  
355 devices for cystoscopy. 4) Part 3: Discreet choice experiment: Finally, the experimental design on the DCE with  
356 a brief introduction for the task and the explanation on each of the attributes to evaluate.

#### 357 **7) Data - Collection Plan;**

358 The Discreet choice experiment method was performed in an empirical way, collecting data based on a plan for  
359 sampling strategy, mode of administration and assessment of ethical considerations. According to Orme BK  
360 2006 the minimum sample size recommended are 300 respondents with 200 resp. per group of subgroup  
361 analysis. The current study includes 300 respondents of a subgroup, in this case the subgroup are patients who  
362 had undergone a cystoscopy procedure.<sup>3</sup>

363 The mode to administer the survey was done through email. The company IQVIA was in charge of distributing  
364 the link survey to each patient and it was done through an extra QuestionPro account. IQVIA has a database,  
365 where they could look according to the criteria of several pathologies. The pathologies were suggested  
366 according to the previous knowledge on which a cystoscopy may be required. This was the starting point for  
367 IQVIA to select the possible respondents. From an approximate pool of 1512 individuals who had click to enter  
368 the survey, 300 were selected as the ones who complied the acceptance criteria to have at least one cystoscopy  
369 procedure before and completed the full survey.

370 The accuracy and the easiness for completion of the questionnaire was assured by simplifying as much as  
371 possible each question. The questionnaire was reviewed by three people having different inputs and agreeing in  
372 the most simplified way assessing readability, population suitability, and ethical aspects.

373 As this study did not collect any personal data, none ethical approval was necessary. However, the legal  
374 consent in the survey was requested. The approval of the consent was done after each respondent will click  
375 continue in the first part of the questionnaire. Besides © 2020 QuestionPro is ISO 27001:2013 certified  
376 company, which is globally recognized internationally for standard management of risks and conforms with the  
377 General Data Protection Regulation (GDPR) privacy and data security by the European Union-regulation.<sup>11</sup>

378 **8) Statistical analyses;**

379 A good understanding of the preference data and its characteristics is highly required for a well-made DCE. To  
380 be able to do this, is also relevant to understand the alternative methods, the assumptions made, strongpoints  
381 and restrictions of the method chosen.<sup>12</sup> The task force article by Hauber et al, 2016, aims to gather all the  
382 different methods used in DCE. Because there is some inconsistency in the methods used and a lack of  
383 knowledge in the common audience about other alternative methods, the article mentioned, can help to give a  
384 brief understanding of the statistical methods more used.

385 **Coding of attributes:** There are two ways of coding the attributes. It can be effects coding or dummy-variable  
386 coding. In either way, one level of each attribute is omitted. This means when one profile/alternative level was  
387 chosen it will be appearing as 1 while the non-chosen will be 0. In the approach of effect coding the non-omitted  
388 levels are represented as -1 when the omitted level is present. On the second approach of the dummy-variable,  
389 all non-omitted levels will be 0 when the omitted level is present. The decision of which approach to use may  
390 depend on the simplification for the understanding of the estimates.

391 For this study the dummy-variable coding method was used. This means that the coefficients estimated,  
392 represent a measure of the strength of the preference of that level making refence to the omitted level of that  
393 specific attribute. Therefore, the statistical significance will be reflecting the difference between that preference  
394 weight and the omitted category.

395 **Data Generated:** The date was imported from QuestionPro to Stata/SE 16.0. Each respondent was coded with  
396 an ID, each respondent then answered between 2 profiles/alternatives, 6 times. Generating 12 tasks. The Task  
397 is the number of the choice task. This generated 3600 observations or rows as there were 300 respondents.  
398 (12x300). All the levels of each attribute were classified into a variable with the dummy-variable approach.  
399 Where 1 was representing the chosen alternative and 0 the non-chosen. All the mid-levels were selected as the  
400 reference meaning the omitted ones. Thanks to the dummy-variable coding is possible to get meaningful  
401 interpretations between the changes in attribute levels, in contrast of having the absolute values of preference  
402 weights alone. Fourteen main variables were considered for the DCE experiment.



403 **Model:** Most of the commonly used methods to analyze DCE in health care are extensions of the Conditional  
404 Logit Model which according to Mc Fadden (1974) is consistent with the random utility theory, originally for  
405 transportation choices. Among these extensions it can be found the Random Parameter (mixed) Logit (RPL) or  
406 also called the “mixed-logit”, the Hierarchical Bayes (HB) usually used to model responses from each individual  
407 and not all observations from a sample, allowing also preference heterogeneity, and the Latent-Class Finite-  
408 Mixture model (LCM) which are based on limited dependent-variable models consistent with random utility and  
409 assuming a probability of choosing an alternative from 0% to 100%.<sup>12</sup> Thanks to the random utility theory (RUT),  
410 the utility connected with an alternative, is a function of the observed level and also the unobserved ones. This  
411 assumes that a respondent will try to maximize his or her utility when making a choice between two or more  
412 alternatives. Being a utility maximizer assuming that the individual acts rationally when making a choice, looking  
413 for the highest utility.<sup>7</sup> The random utility comes from the probabilistic choice theory and this one is based on the  
414 assumption that there is some uncertainty in line to the choice of an individual, being hard to predict individual  
415 choices in a perfect way. This model assigns to each alternative a probability of being picked. The model can be  
416 classified into two families:<sup>7</sup>

- 417 1. Decision rule assumed to be random; Utility deterministic – Individual’s behavior can change according to  
418 internal and external factors (Intrinsically probabilistic)
- 419 2. Decision rule assumed to be deterministic; Utility Random – Inability of the analyst to frame the individual’s  
420 behavior.

421 For binary discrete choice models, where respondents are to answer more than one choice, the variation across  
422 individuals, is not considered random, the following utility formula can be represented as:

$$423 \quad U_{in} = V_{in} + \epsilon_{in} + \mu_n$$

424 Where n is representing a respondent, V is the function defined by the attribute levels for alternative i in a set of  
425 alternatives up to J, and  $\epsilon_i$  is the random error, which can be represented as the lack of information that the  
426 individual has for making a choice

427 Lastly,  $\mu_n$  represents the random error across respondents and will be a constant for each respondent, in this  
428 case is null. In the aim to clarify, one example from the actual questionnaire in Table 1:

429

**Table 1:** Example of the choice sets

| Attributes                    | Alternative 1 (i) | Alternative 2 (j) |
|-------------------------------|-------------------|-------------------|
| Direct Cystoscopy             | No ( $X_{i1}$ )   | Yes               |
| Risk of Cancellation          | 6% ( $X_{i2}$ )   | 6%                |
| Contamination                 | 0% ( $X_{i3}$ )   | 0%                |
| Negative Environmental Impact | High ( $X_{i4}$ ) | High              |
| Cost per Procedure            | 165€ ( $X_{i5}$ ) | 70€               |

430

431 Each alternative provides a utility and the RUT assumes that each respondent will choose the alternative with  
 432 the highest utility. The utility is then decomposed into the observed factors, like attributes, alternatives and  
 433 attributes of the decision maker that will affect the utility, plus the unobserved factors. Then  $V$  is a vector of the  
 434 attributes of the alternative and also the vector of attributes of the decision maker. In this study, the decision  
 435 maker attributes were generalized so we should only take into account the attributes of the alternative. Being  
 436 denoted as:

437

$$V_{nj} = \beta' X_{nj}$$

438 where  $n$  represents a respondent. Assuming a linear utility function, as its usually done as a standard practice in  
 439 DCE,<sup>7</sup> the utility formula could be represented as

440

$$U_{nj} = \beta' X_{nj} + \epsilon_{nj}$$

441 Thereafter the coefficient  $\beta$  represents the relationship of the observed attributes with the unobserved utility. The  
 442 respondent is to maximize the total utility but not the representative utility. The representative utility is part of the  
 443 total utility. The representative utility will be then denoted as below:

444 (Note: in the study there is no intercept coefficient as they are cancelled in the likelihood and therefore do not have an  
 445 identifiable role in the model (Ying So, 2010))

446

$$V_{n1} = \beta_0 + \beta_1 X_{ni1} + \beta_2 X_{ni2} + \beta_3 X_{ni3} + \beta_4 X_{ni4} + \beta_5 X_{ni5}$$

447  $V_{n1}$  is representing the representative utility of choosing alternative 1,  $\beta_1$  then represents the coefficient that will  
448 be calculated to show the marginal utility of the respondent relative to the attribute 'Direct Cystoscopy', thereafter  
449 calculated with  $X_{ni1}$  which is representing the level of 'Direct cystoscopy' in this case 'No'. The same will be with  
450  $\beta_2 X_{i2}$  which is then the coefficient to be calculated of the attribute 'Risk of cancellation' and  $X_{i2}$  is one of the  
451 levels of the attribute in this case 6%. So on and so forth for the last three attributes. When one of the attributes  
452 is 'Cost' the marginal willingness to pay or part-worth's can be calculated. For the dummy coding effect, the  
453 values here will be 1 if chosen zero if not chosen Thereafter the use of the probability statements where it will be  
454 desired that the probability of the alternative chose will be close to 1 and the probability of the no chosen  
455 alternative will be close to 0. As the probability is on a cardinal scale, so are the utility scores therefore a  
456 meaningful wtp can be calculated thanks to the cardinal scale,<sup>7</sup> and 'all health interventions can be ranked  
457 according to their willingness to pay.<sup>2</sup> Is important to highlight that what is relevant is to compare the level of  
458 utility among the two alternatives. For this study the Conditional Logit model (CLM) was used.

#### 459 **Conditional Logit Model**

460 Helps to relate the probability of choice between two or more alternatives relative to the levels/characteristics of  
461 the attributes. In other words, it can help to estimate the average preferences in a sample, though it may not  
462 explain for preference heterogeneity or variability and this could lead to some bias, unlike the RPL mixed logit  
463 model which is becoming more used. Heterogeneity suggest that preferences vary among individuals therefore  
464 the analyst cannot know which type of preference is hold by the individual and as a consequence cannot predict  
465 accurately the choices made.<sup>7</sup>

466 This study used a binary discrete choice showing to the respondent two alternatives, where the dependent  
467 variable had two states.

468 The CLM based on logistic regression or logit regression, and multinomial logit model (RPL) has the same  
469 statistical assumptions though multinomial logit usually aims to relate the choices made to the characteristics of  
470 the respondents while in contrast the CLM relates the choices to the elements defining the alternatives in  
471 between the respondents. Therefore, the conditional model was more relevant for this study where the general  
472 preferences of patients are willing to be discovered. Thereafter the multinomial logit is more suitable when the  
473 dependent variable has more than 2 alternatives. In this study, the dependent variable has only two options.

474 (selected or non-selected) therefore the CLM model was chosen. Thereafter, HB methods may also require  
475 updates in preferences estimates repetitively and this may be a concern for transparency compared to other  
476 methods. Lastly the LCM method requires a more specialized software in contrast to the conditional logit model  
477 which many software's have available. It also requires a deeper substantial judgment from the analyst side as  
478 well as a larger sample size to adjust for the increased number of parameters needed.

479 The conditional logit model is also called fixed effects logit models and is based on the logistic regression that is  
480 based on log(odds) as unit of measurement, which can be defined as a scale of the coefficients on the Y axis.  
481 The logistic regression is similar to linear regression but is predicted whether something is true or false or  
482 something continuous. Logistic regression tries to fit an "s" shape from 0 to 1 and it can be useful for discrete  
483 and continuous data. It is also useful to classify which variables are useful for organizing the samples.<sup>13</sup>  
484 Thereafter, conditional logistic regression is an extension of the logistic regression which takes into account  
485 stratification and matching. The main difference between logistic regression and conditional logistic regression is  
486 that the respondents are exposed to different situations before stating their choice. Then instead of having  
487 individual characteristics in the logistic regression, there will be characteristics of the different alternatives, in this  
488 case attributes, proposed to the respondents in the CLM. The observations are not independent within a block  
489 from the same respondent.<sup>14</sup> So, there is one row for each profile/alternative per choice task per respondent. In  
490 this study each respondent had 12 rows as there were 6 choice sets and 2 alternatives in each.

491 Differing from linear regression into how to measure the explanatory power of the model, the logistic regression  
492 uses the log likelihood.<sup>12</sup> After trying to find the best fit by picking a probability in the "s" line and observe the  
493 probability in another point, the curve with the maximum likelihood is selected. The algorithm with the maximum  
494 likelihood, find the optimal fit and that's the one chosen as the best fit. However, the log likelihood can-not be  
495 used alone to measure the model fit, it can be useful to calculate the "goodness-of-fit" like with the likelihood of  
496 the chi-square test and Mc Fadden's pseudo-R-squared.

497 In the conditional logistic regression, the likelihoods are computed relative to each stratum. Stata calculates the  
498 maximum likelihood of the dependent variable which in this case is dichotomous.<sup>15</sup> As some of the  
499 characteristics to consider for the conditional logistic regression, a few are named:

500 • There should be a panel data or longitudinal data, which can provide information about the behavior of  
501 the individuals.

502 • The dependent variable has to be binary or dichotomous.

503 • The same individuals are measured at two or more time points, in this case six scenarios/ choice sets  
504 were presented so they are considered to be measured six times.

505 Whilst several data assumptions have to be taken into account:

506 • Every respondent should have two or more measurements on the same dependent variable.

507 • For some of the individuals in the sample, the values of the independent variable must change over  
508 time. The change in the independent variable may create changes in the dependent variable, meaning if  
509 the dependent variable does not change over time those respondents should not be considered.

510 On one hand some of the benefits of the conditional logistic regression are that all the characteristics are  
511 controlled and therefore stable and out of the regression i.e., ethnicity and birth year, which may contribute to  
512 reducing bias. This model is better to estimate variables that can change over time, and another reason to  
513 attribute a plus is that it would be hard to attach behavioral interpretation when focusing only on the  
514 characteristics of the individual and not of the good.

515 The reason why CLM is a good fit for DCE experiment according to Hoffman and Duncan 1988, is due to the  
516 choice between alternatives is modeled as a function of the characteristics of the alternatives, in other words of  
517 the attributes and its levels, instead of the characteristics of the respondent who is making the choice. In this  
518 study the attributes have two or more levels describing to be chosen.

519 The DCE allows to control over some attributes and levels and at the same time helps to decompile the impact  
520 of the changes in the attribute levels in a quantifiable manner. The effects of the impact represent the strength  
521 for the preference also called “part-worth utility” or “preference weights”.

522 The estimated model in Stata/SE 16.0 was performed in the following way:

523 *clogitselected, immediately to cystoscopy Risk of cancellation 0%, Risk of cancellation 12% Risk of*  
524 *contamination 0% Risk of contamination 12% Negative environmental impact Low Negative environmental*  
525 *impact High Cost per, group (taskid)*

526 The command *clogit*, represents the CLM, in Stata, the second object “selected” is the dependent variable tailed  
527 by the regressors. As Stata needs extra info to identify which observations to compose the variable *Taskid* helps  
528 the software to recognize the observations group for a particular choice. From the conditional logit model the  
529 command *WTP* (willingness to pay) is used to estimate the willingness to pay for each attribute. Next, the  
530 estimated coefficients can be represented as a preference weight, representing the relative contribution or the  
531 so-called relative importance of the attribute levels or the utility that respondent’s assign to an alternative.

532 The *WTP* of a respondent for a unit of change in the specified attribute can be found thanks to the ratio  
533 (marginal rate of substitution) of an attribute over the absolute cost.<sup>2</sup> by measuring the utility that each  
534 respondent put into attributes, explaining the relevance of importance of the choices attributes for decision  
535 making when being ask which device they will prefer. The understanding of the probabilities allows a cardinal  
536 utility scale which is needed to compare possible benefits, in this case monetary measures like the willingness to  
537 pay.<sup>7</sup>

538

## 539 **References**

- 540 1. Marcin TC. A Characteristics Model Approach to Demand Analysis for Wood Composites. *For Sect trade*  
541 *Environ impact Model theory Appl Proc an Int Symp.* 1992:119-124.
- 542 2. Drummond M, Sculper MJ, Claxon K, Stoddart G, Torrance G w. *Methods for Economic Evaluation.* 4 th  
543 ed. New York ; Oxford University Press; 2015.
- 544 3. Bridges JFP, Hauber AB, Marshall D, et al. Conjoint analysis applications in health - A checklist: A report  
545 of the ISPOR Good Research Practices for Conjoint Analysis Task Force. *Value Heal.* 2011;14(4):403-  
546 413. doi:10.1016/j.jval.2010.11.013
- 547 4. Johnson FR, Lancsar E, Marshall D, et al. Constructing experimental designs for discrete-choice  
548 experiments: Report of the ISPOR conjoint analysis experimental design good research practices task  
549 force. *Value Heal.* 2013;16(1):3-13. doi:10.1016/j.jval.2012.08.2223

- 550 5. Lemièrre C. Discrete Choice Experiment (DCE): a methodology for eliciting health workers preferences.  
551 *World Bank Webminar*. January 2009:6. Available from:  
552 [https://www.who.int/hrh/migration/hmr\\_expert\\_meeting\\_lemiere.pdf](https://www.who.int/hrh/migration/hmr_expert_meeting_lemiere.pdf). Accessed: August 30, 2021.
- 553 6. Rose J. Workshop on Experimental Design and Data Analysis Experimental Design. University of Sydney  
554 Webinar, December 04,05,2012. Accessed August 30, 2021.  
555 <file:///C:/Users/Cindy/Downloads/Workshop%20John%20Rose.pdf>
- 556 7. Kjær T. A Review of the Discrete Choice Experiment - With Emphasis on its Application in Healthcare.  
557 *Heal Econ Pap*. University of Southern Denmark. 2005;(1):1-139. Available from: [https://www.sdu.dk/-](https://www.sdu.dk/-/media/files/om_sdu/centre/cohere/working+papers/20051pdf.pdf)  
558 [/media/files/om\\_sdu/centre/cohere/working+papers/20051pdf.pdf](https://www.sdu.dk/-/media/files/om_sdu/centre/cohere/working+papers/20051pdf.pdf). Accessed: August 27, 2021
- 559 8. Zwerina K, Huber J, Kuhfeld W. A general method for constructing efficient choice designs. Durham, NC  
560 Fuqua Sch Business, Duke Univesrity. 1996;(September):39-59. Available from: Zwerina Kuhfeld  
561 Huber.pdf (duke.edu). Accessed: August 30,2021.
- 562 9. QuestionPro. Conjoint Analysis- D-Optimal Design |. Published 2021. Available from:  
563 <https://www.questionpro.com/help/conjoint-analysis-d-optimal-design.html>.. Accessed August 20, 2021
- 564 10. Nist Sematech. 5.5.2.1. D-Optimal designs. Engineering Statistics Handbook. Published 2021. Available  
565 from: <https://www.itl.nist.gov/div898/handbook/pri/section5/pri521.htm>.. Accessed August 20, 2021.
- 566 11. QuestionPro. Security & Privacy | QuestionPro. Published 2020. Available from:  
567 <https://www.questionpro.com/security/>.. Accessed August 23, 2021.
- 568 12. Hauber AB, González JM, Groothuis-Oudshoorn CGM, et al. Statistical Methods for the Analysis of  
569 Discrete Choice Experiments: A Report of the ISPOR Conjoint Analysis Good Research Practices Task  
570 Force. *Value Heal*. 2016;19(4):300-315. doi:10.1016/j.jval.2016.04.004
- 571 13. Politzer-Ahles S. Interpreting logistic regression coefficients. Published 2016. Available from:  
572 <https://www.polyu.edu.hk/cbs/sjpolit/logisticregression.html>.. Accessed August 31, 2021.
- 573 14. Xlstat A. Conditional Logit model | Statistical Software for Excel. Published 2021. Available from:  
574 <https://www.xlstat.com/en/solutions/features/conditional-logit-model>.. Accessed August 31, 2021.
- 575 15. StataCorp. Logistic regression | Stata. Published 2021. Available from:  
576 <https://www.stata.com/features/overview/logistic-regression/>.. Accessed August 31, 2021.
- 577

578 Borja Brugés et al

579 **Willingness to Pay and Preferences among Patients Undergoing Cystoscopies: Results from a Large**  
580 **Survey-based Study in Spain**

581 **Appendix A3**

582 **Variables**

| <b>Variable Name</b>   | <b>Variable Description</b>                                                                                              |
|------------------------|--------------------------------------------------------------------------------------------------------------------------|
| <b>ID</b>              | Respondents ID                                                                                                           |
| <b>TaskID</b>          | Particular value for each choice set.                                                                                    |
| <b>Inst_Cystoscopy</b> | The availability to go direct to cystoscopy<br>in the same day, Yes/ No, qualitative variable.                           |
| <b>Risk_C1</b>         | Risk for cancellation of the cystoscopy 0%, quantitative variable. Dummy-variable coded.                                 |
| <b>Risk_C2</b>         | Risk for cancellation of the cystoscopy 6% , quantitative variable. (Chose as reference, omitted). Dummy-variable coded. |
| <b>Risk_C3</b>         | Risk for cancellation of the cystoscopy 12%, quantitative variable. Dummy-variable coded.                                |
| <b>Cont_R1</b>         | Risk of Contamination during cystoscopy 0%, quantitative variable. Dummy-variable coded.                                 |
| <b>Cont_R2</b>         | Risk of Contamination during cystoscopy 6%, quantitative variable. (Chose as refence, omitted). Dummy-variable coded.    |
| <b>Cont_R3</b>         | Risk of Contamination during cystoscopy 12%, quantitative variable. Dummy-variable coded.                                |



|                                        |                                                                                                                                                                            |
|----------------------------------------|----------------------------------------------------------------------------------------------------------------------------------------------------------------------------|
| <b>Environmental<br/>_Imp_Low1</b>     | Low Negative Environmental Impact, Qualitative Variable. Dummy-variable coded.                                                                                             |
| <b>Environmental<br/>_Imp_Neutral2</b> | Neutral Negative Environmental Impact, Qualitative Variable. (Chose as refence, omitted). Dummy-variable coded.                                                            |
| <b>Environmental<br/>_Imp_High3</b>    | High Negative Environmental Impact, Qualitative Variable. Dummy-variable coded.                                                                                            |
| <b>Cost</b>                            | Cost per procedure of cystoscopy. Continuous Variable.                                                                                                                     |
| <b>Selected</b>                        | Dichotomous variable, representing the profile/alternative chosen by the respondent in each scenario. 1 for the selected and 0 for the non-selected. Dummy-variable coded. |
